# Supplementary material
Source: Springer Nature journal article supplement (https://www.springermedizin.de/resource/supplementary/12913_2013_3556_MOESM1_ESM.pdf/9533224)

**General analysis of organizing for quality  
(Country specific)**

**Synthesis of local analysis  
(Across countries)**

**Macro level**

Macro level  
documents  
and interviews

Coding  
according to  
predefined  
framework

Local analysis and country  
specific report

Analysis of country specific  
reports focusing on national  
definitions of quality and  
drivers for change

**Meso and micro level**

Individual and  
focus group  
interviews,  
observation in  
local language

Coding  
according to  
predefined  
framework

Local analysis and country  
specific report

Analysis of country specific  
reports focusing on  
conceptualization of quality

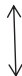

Supplement: MOESM1 [file 9533224]
